# Supplementary material for: Strongly enhanced static friction using a film-terminated fibrillar interface
Source: Royal Society of Chemistry journal article supplement (doi:10.1039/b714737f), 2008-01-01
Supplement: b714737f.pdf [file b714737f.pdf]

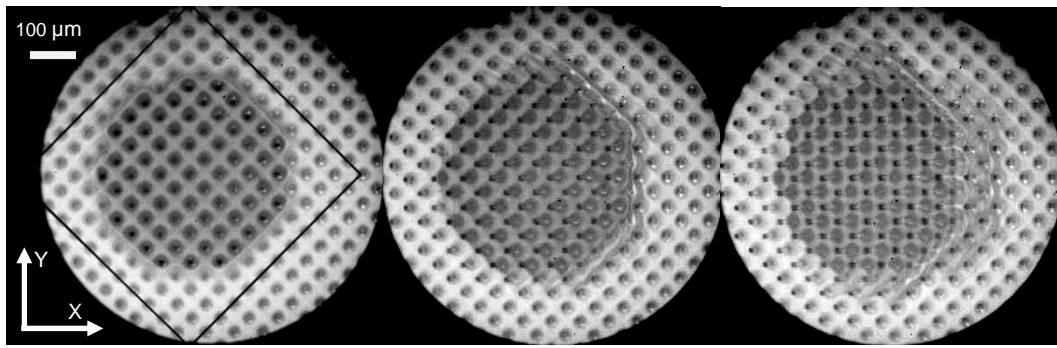

(A)

(B)

(C)

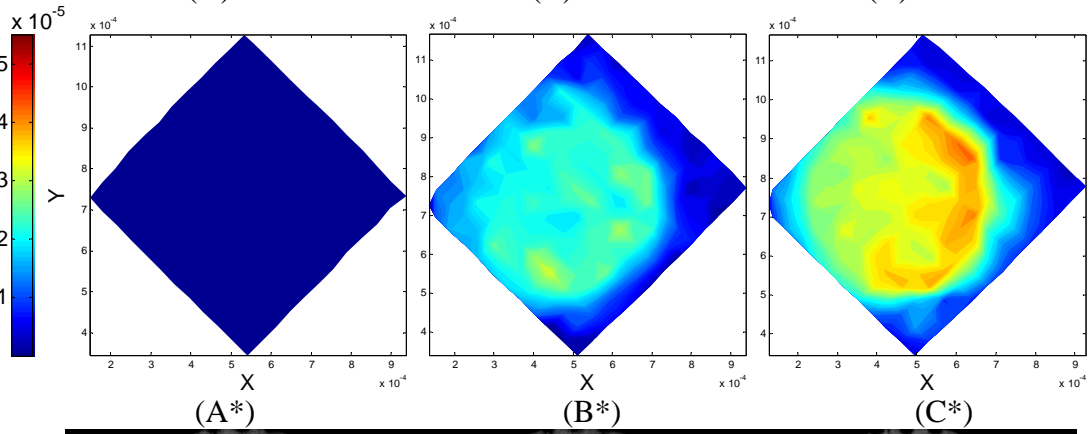

(A\*)

(B\*)

(C\*)

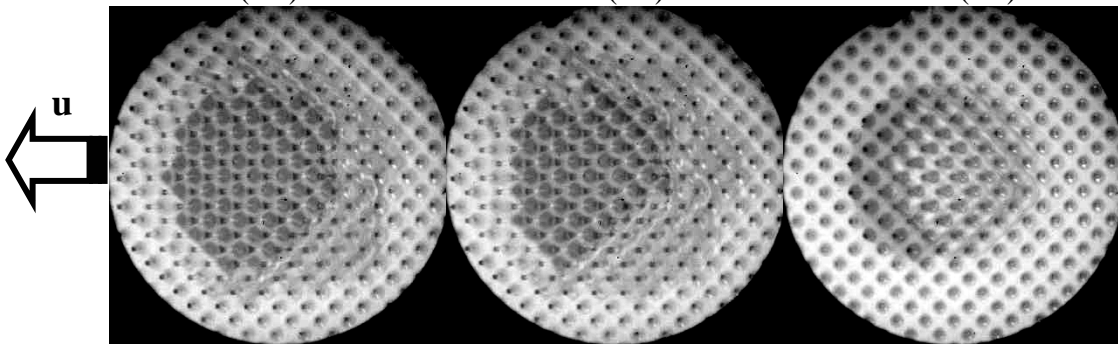

(D)

(E)

(F)

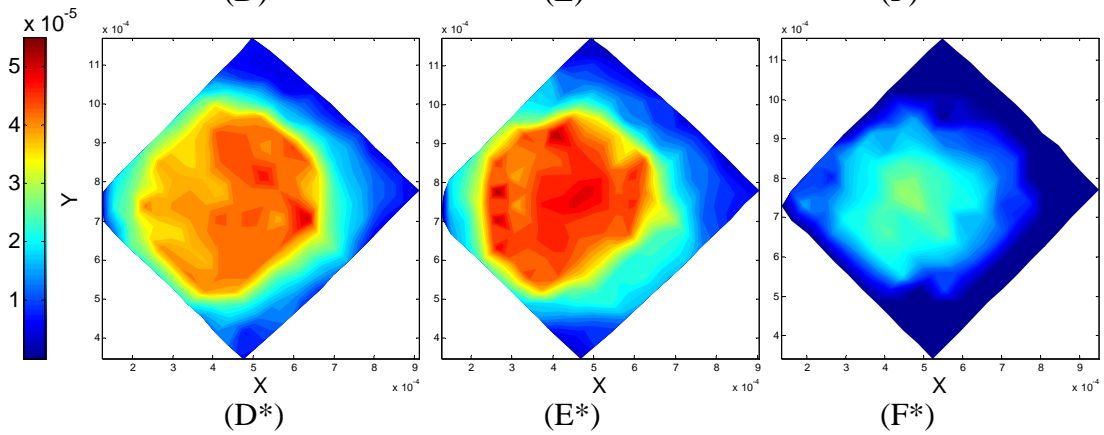

(D\*)

(E\*)

(F\*)

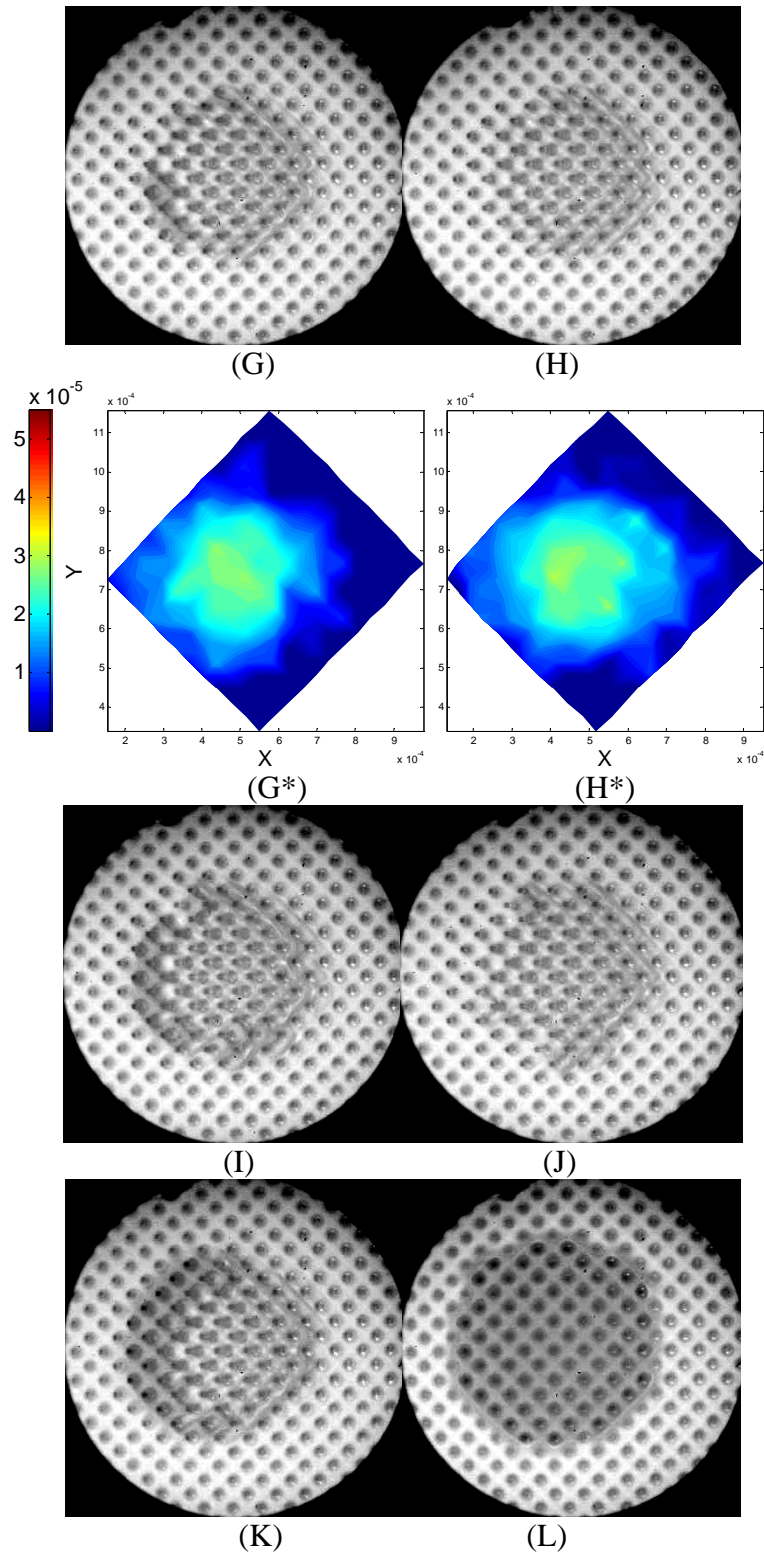

**Fig. 11** Series of images for the fibrillar sample under shear. Figure labels correspond to points on the plot shown in Fig. 10. Also shown are contour plots of shear displacement across the fibrillar layer in color.
